# Supplementary material for: Solution-processed CdS quantum dots on TiO2: light-induced electrochemical properties
Source: Royal Society of Chemistry journal article supplement (doi:10.1039/c6ra14275c), 2016-01-01
Supplement: c6ra14275c1.pdf [file c6ra14275c1.pdf]

**Supplementary Material for:**

**Solution processed CdS Quantum dots on TiO<sub>2</sub>: Light induced  
electrochemical properties**

**Babasaheb R. Sankapal<sup>a,\*</sup>, Dipak B. Salunkhe<sup>b</sup>, Sutripto Majumder<sup>a</sup>, Deepak P. Dubal<sup>c</sup>**

*<sup>a</sup>Nano Materials and Device Laboratory, Applied Physics Department, Visvesvaraya National  
Institute of Technology, Nagpur-440 010 (M.S.) India*

*<sup>b</sup>Thin Film and Nano Science Laboratory, Department of Physics, School of Physical Sciences,  
North Maharashtra University, Jalgaon - 425 001 (M. S.) India*

*<sup>c</sup>Catalan Institute of Nanoscience and Nanotechnology, CIN2, ICN2 (CSIC-ICN), Campus UAB,  
E-08193 Bellaterra, Barcelona, Spain*

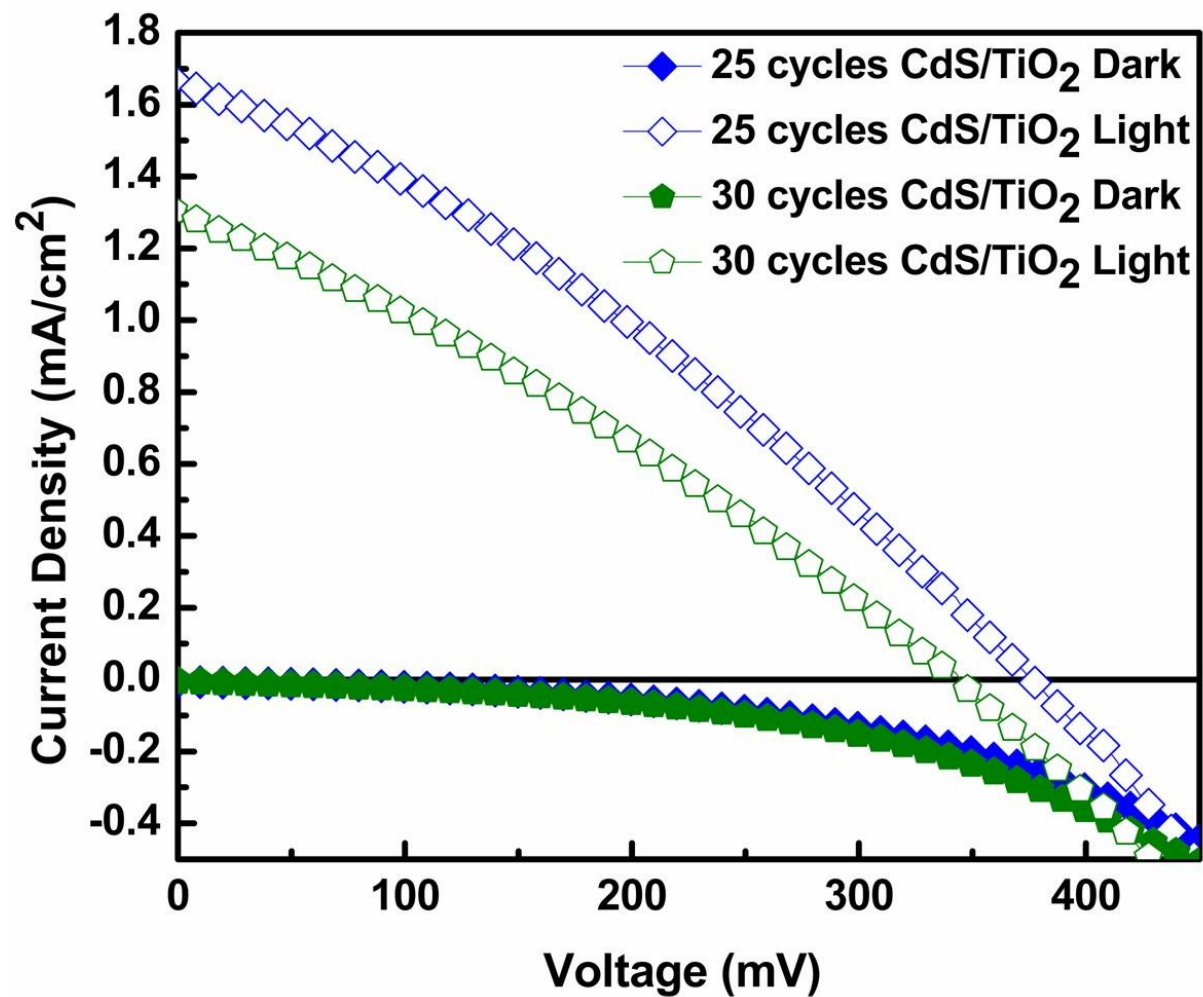

Fig. S1 represents current density vs voltage characteristics under dark and illumination for 25 and 30 cycles of SILAR immersions of CdS over TiO<sub>2</sub>

| <b>TiO<sub>2</sub>/CdS</b> | <b>J<sub>sc</sub></b>       | <b>V<sub>oc</sub></b> | <b>FF</b>  | <b>η</b>   | <b>R<sub>s</sub></b> | <b>R<sub>sh</sub></b> |
|----------------------------|-----------------------------|-----------------------|------------|------------|----------------------|-----------------------|
| <b>SILAR</b>               | <b>(mA.cm<sup>-2</sup>)</b> | <b>(mV)</b>           | <b>(%)</b> | <b>(%)</b> | <b>(Ω)</b>           | <b>(kΩ)</b>           |
| <b>Cycles</b>              |                             |                       |            |            |                      |                       |
| 25                         | 1.660                       | 376                   | 30.1       | 0.377      | 249                  | 1.44                  |
| 30                         | 1.296                       | 344                   | 29.5       | 0.263      | 207                  | 1.14                  |

**Table : T1** Photovoltaic parameters of the device for 25 and 30 SILAR cycles immersion of CdS over TiO<sub>2</sub>
